# Supplementary material for: The prehospital quick SOFA score is associated with in-hospital mortality in noninfected patients: A retrospective, cross-sectional study
Source: PubMed Central journal article supplement (PMC6095537; doi:10.1371/journal.pone.0202111), 2018-08-16
Supplement: pone.0202111.s001.pdf [file pone.0202111.s001.pdf]

**S1 Table . quick Sequential Organ Failure Assessment (qSOFA) score**

| <b>parameter</b>                        | <b>point</b> |
|-----------------------------------------|--------------|
| respiratory rate $\geq 22$ breaths/min  | 1            |
| systolic blood pressure $\leq 100$ mmHg | 1            |
| altered mental status GCS $<15$         | 1            |
