# Supplementary material for: The prehospital quick SOFA score is associated with in-hospital mortality in noninfected patients: A retrospective, cross-sectional study
Source: PubMed Central journal article supplement (PMC6095537; doi:10.1371/journal.pone.0202111), 2018-08-16
Supplement: pone.0202111.s002.pdf [file pone.0202111.s002.pdf]

**S2 Table . Modified Early Warning Score (MEWS)**

|                                | 3   | 2     | 1      | 0       | 1                    | 2                   | 3             |
|--------------------------------|-----|-------|--------|---------|----------------------|---------------------|---------------|
| Respiratory rate (breaths/min) |     | <9    |        | 9-14    | 15-20                | 21-29               | ≥30           |
| Heart rate (beats/min)         |     | <40   | 41-50  | 51-100  | 101-110              | 111-129             | ≥130          |
| Systolic blood pressure (mmHg) | <70 | 71-80 | 81-100 | 101-199 |                      | ≥200                |               |
| Temperature (°C)               |     | <35   |        | 35-38.4 |                      | ≥38.5               |               |
| Coscious level (AVPU score)    |     |       |        | Alert   | Reacting to<br>Voice | Reacting to<br>Pain | Unresponsible |
