# Supplementary material for: The prehospital quick SOFA score is associated with in-hospital mortality in noninfected patients: A retrospective, cross-sectional study
Source: PubMed Central journal article supplement (PMC6095537; doi:10.1371/journal.pone.0202111), 2018-08-16
Supplement: pone.0202111.s003.pdf [file pone.0202111.s003.pdf]

# Outcome: admission

A qSOFA score vs each parameter

**All**                      **Infected patients**                      **Noninfected patients**

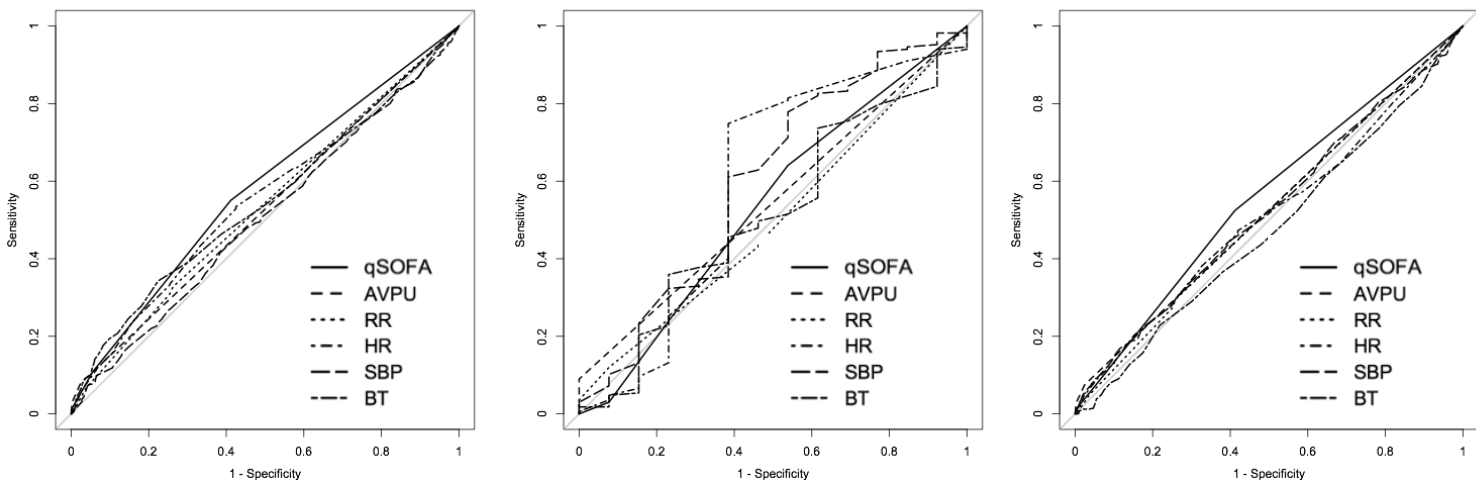

| AUC   | All (95% CI)     | Infected patients (95% CI) | Noninfected patients (95% CI) |
|-------|------------------|----------------------------|-------------------------------|
| qSOFA | 0.58 (0.55-0.60) | 0.54 (0.37-0.71)           | 0.56 (0.53-0.59)              |
| AVPU  | 0.53 (0.52-0.54) | 0.55 (0.52-0.57)           | 0.53 (0.51-0.54)              |
| RR    | 0.53 (0.51-0.56) | 0.50 (0.36-0.64)           | 0.52 (0.49-0.54)              |
| HR    | 0.55 (0.52-0.58) | 0.59 (0.39-0.79)           | 0.51 (0.48-0.54)              |
| SBP   | 0.50 (0.48-0.53) | 0.60 (0.41-0.78)           | 0.52 (0.49-0.55)              |
| BT    | 0.54 (0.51-0.57) | 0.51 (0.34-0.68)           | 0.47 (0.44-0.51)              |

## B qSOFA score vs MEWS

**All**                      **Infected patients**                      **Noninfected patients**

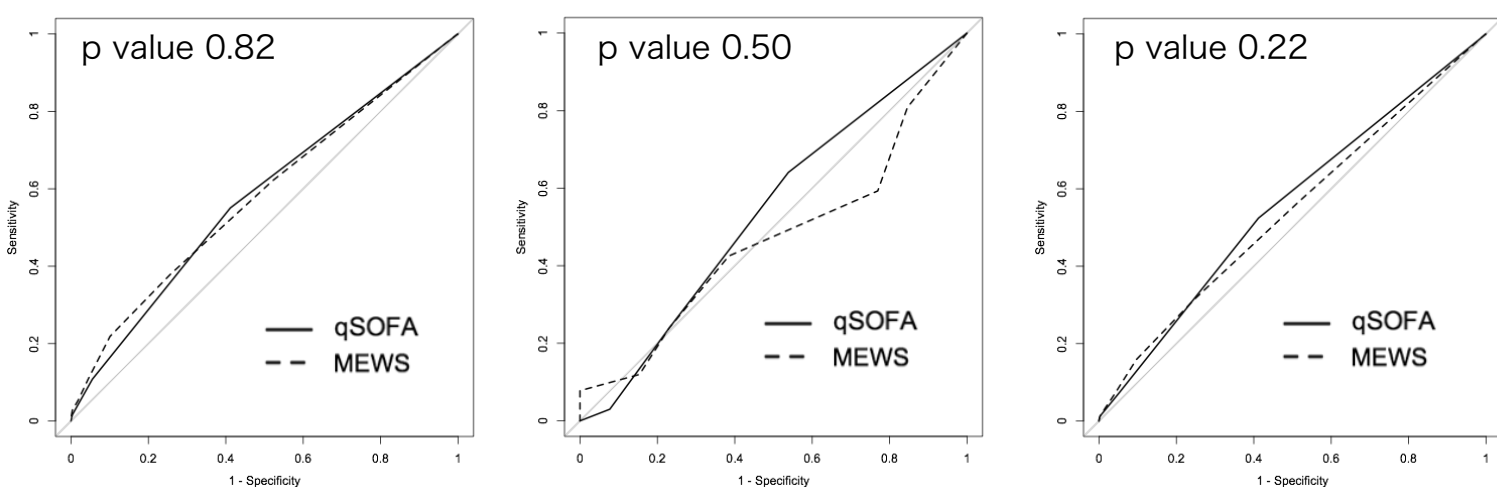

| AUC   | All (95% CI)     | Infected patients (95% CI) | Noninfected patients (95% CI) |
|-------|------------------|----------------------------|-------------------------------|
| qSOFA | 0.58 (0.55-0.60) | 0.54 (0.37-0.71)           | 0.56 (0.53-0.59)              |
| MEWS  | 0.58 (0.55-0.60) | 0.47 (0.32-0.62)           | 0.54 (0.51-0.57)              |
